# Supplementary material for: Species- and Metal-Specific Responses of the Ionome of Three Duckweed Species under Chromate and Nickel Treatments
Source: MDPI journal article supplement (doi:10.3390/plants12010180), 2023-01-01
Supplement: s1 [file s1]

Table S1 ICP-OES settings I.

|                    |                          |
|--------------------|--------------------------|
| Replicates         | 3                        |
| Pump speed         | 15 rpm                   |
| Uptake time        | 15 sec                   |
| Rinse time         | 30 sec                   |
| Read time          | 10 sec                   |
| RF power           | 1.20 kW                  |
| Stabilization time | 15 sec                   |
| Nebulizer flow     | 0.70 L min <sup>-1</sup> |
| Plasma flow        | 12.0 L min <sup>-1</sup> |
| Aux flow           | 1.0 L min <sup>-1</sup>  |
| Viewing height     | 8 mm                     |

Table S2. *Table 2* ICP-OES settings II.

| Element | Wavelength | Viewing mode | Stabilization time (sec) |
|---------|------------|--------------|--------------------------|
| Al      | 396.152    | axial        | 10                       |
| B       | 249.772    | axial        | 10                       |
| Ba      | 455.403    | axial        | 10                       |
| Bi      | 223.061    | axial        | 10                       |
| Ca      | 445.478    | radial       | 3                        |
| Cd      | 226.502    | axial        | 10                       |
| Co      | 228.615    | axial        | 10                       |
| Cr      | 267.716    | axial        | 10                       |
| Cu      | 324.754    | axial        | 10                       |
| Fe      | 238.204    | axial        | 10                       |
| K       | 766.491    | radial       | 3                        |
| Li      | 670.783    | axial        | 10                       |
| Mg      | 279.800    | radial       | 3                        |
| Mn      | 257.610    | axial        | 10                       |
| Na      | 589.592    | radial       | 3                        |
| Ni      | 216.555    | axial        | 10                       |
| Pb      | 220.353    | axial        | 10                       |
| Sr      | 421.552    | axial        | 10                       |
| Zn      | 213.857    | axial        | 10                       |

Table S3 Concentration (mg l<sup>-1</sup>) of the analyzed elements in the Steinberg medium on the first (0 day) and last day (3 days) of the heavy metal treatments. Mean±SD of n=6 samples. Bold figures indicate significantly different median concentrations of the respective element within a given treatment (control, Cr(VI) and Ni, respectively) on the 3<sup>rd</sup> day as compared to the 0<sup>th</sup> day, according to the Mann-Whitney test. <LoD denotes that the concentration of the given element was below the limit of detection.

|                                |                | <b>B</b>                      | <b>Ca</b>                    | <b>Cr</b>                     | <b>Cu</b>       | <b>Fe</b>                     | <b>K</b>                    | <b>Mg</b>                    | <b>Mn</b>                     | <b>Na</b>                     | <b>Ni</b>                     | <b>Sr</b>       | <b>Zn</b>                     |
|--------------------------------|----------------|-------------------------------|------------------------------|-------------------------------|-----------------|-------------------------------|-----------------------------|------------------------------|-------------------------------|-------------------------------|-------------------------------|-----------------|-------------------------------|
| <b>control 0 day</b>           |                | 0.084<br>±0.002               | 54.11<br>±0.33               | <LoD                          | 0.006<br>±0.001 | 0.155<br>±0.008               | 162.6<br>±4.7               | 10.04<br>±0.12               | 0.031<br>±0.000               | 0.635<br>±0.014               | <LoD                          | 0.014<br>±0.000 | 0.055<br>±0.005               |
| <b>Cr(VI) 0 day</b>            |                | 0.086<br>±0.002               | 53.90<br>±0.01               | 3.668<br>±0.046               | 0.006<br>±0.001 | 0.152<br>±0.006               | 163.0<br>±3.6               | 9.96<br>±0.08                | 0.031<br>±0.001               | 1.034<br>±0.152               | <LoD                          | 0.014<br>±0.000 | 0.056<br>±0.001               |
| <b>Ni 0 day</b>                |                | 0.084<br>±0.003               | 53.76<br>±0.32               | <LoD                          | 0.006<br>±0.001 | 0.151<br>±0.004               | 161.2<br>±3.5               | 9.99<br>±0.09                | 0.031<br>±0.000               | 0.635<br>±0.008               | 2.368<br>±0.052               | 0.014<br>±0.000 | 0.069<br>±0.008               |
| <b>Le. minor<br/>3 days</b>    | <b>control</b> | 0.085<br>±0.002               | <b>55.62</b><br><b>±0.33</b> | <LoD                          | 0.006<br>±0.000 | <b>0.136</b><br><b>±0.002</b> | 166.3<br>±1.4               | <b>10.40</b><br><b>±0.08</b> | <b>0.017</b><br><b>±0.001</b> | <b>0.601</b><br><b>±0.008</b> | <LoD                          | 0.014<br>±0.001 | 0.049<br>±0.007               |
|                                | <b>Cr(VI)</b>  | <b>0.092</b><br><b>±0.002</b> | <b>55.43</b><br><b>±0.46</b> | 3.717<br>±0.044               | 0.006<br>±0.000 | 0.147<br>±0.001               | <b>169.1</b><br><b>±1.8</b> | <b>10.31</b><br><b>±0.06</b> | <b>0.029</b><br><b>±0.000</b> | 0.900<br>±0.104               | <LoD                          | 0.014<br>±0.000 | 0.053<br>±0.005               |
|                                | <b>Ni</b>      | <b>0.051</b><br><b>±0.004</b> | <b>55.01</b><br><b>±0.35</b> | <LoD                          | 0.005<br>±0.001 | <b>0.142</b><br><b>±0.001</b> | <b>166.0</b><br><b>±1.7</b> | <b>10.30</b><br><b>±0.02</b> | <b>0.029</b><br><b>±0.001</b> | <b>0.625</b><br><b>±0.003</b> | <b>2.287</b><br><b>±0.031</b> | 0.014<br>±0.000 | <b>0.044</b><br><b>±0.003</b> |
| <b>La. punctata<br/>3 days</b> | <b>control</b> | 0.086<br>±0.004               | <b>55.46</b><br><b>±0.60</b> | <LoD                          | 0.006<br>±0.001 | <b>0.145</b><br><b>±0.003</b> | 166.3<br>±1.9               | <b>10.35</b><br><b>±0.10</b> | <b>0.014</b><br><b>±0.002</b> | 0.613<br>±0.018               | <LoD                          | 0.014<br>±0.001 | 0.051<br>±0.005               |
|                                | <b>Cr(VI)</b>  | <b>0.093</b><br><b>±0.003</b> | <b>54.98</b><br><b>±0.16</b> | 3.704<br>±0.047               | 0.006<br>±0.000 | 0.147<br>±0.001               | 167.5<br>±1.8               | <b>10.24</b><br><b>±0.04</b> | <b>0.028</b><br><b>±0.001</b> | 0.966<br>±0.122               | <LoD                          | 0.014<br>±0.000 | <b>0.051</b><br><b>±0.002</b> |
|                                | <b>Ni</b>      | 0.085<br>±0.002               | <b>55.29</b><br><b>±0.24</b> | <LoD                          | 0.006<br>±0.001 | <b>0.143</b><br><b>±0.001</b> | <b>166.2</b><br><b>±1.7</b> | <b>10.32</b><br><b>±0.05</b> | <b>0.028</b><br><b>±0.001</b> | <b>0.615</b><br><b>±0.005</b> | 2.338<br>±0.038               | 0.014<br>±0.000 | <b>0.037</b><br><b>±0.007</b> |
| <b>S. polyrhiza<br/>3 days</b> | <b>control</b> | 0.084<br>±0.002               | <b>55.24</b><br><b>±0.39</b> | <LoD                          | 0.006<br>±0.001 | <b>0.133</b><br><b>±0.002</b> | 164.8<br>±2.0               | <b>10.26</b><br><b>±0.03</b> | <b>0.017</b><br><b>±0.002</b> | 0.627<br>±0.009               | <LoD                          | 0.014<br>±0.000 | 0.050<br>±0.005               |
|                                | <b>Cr(VI)</b>  | <b>0.098</b><br><b>±0.003</b> | <b>55.14</b><br><b>±0.18</b> | <b>3.719</b><br><b>±0.037</b> | 0.006<br>±0.001 | 0.149<br>±0.003               | 167.6<br>±2.0               | <b>10.26</b><br><b>±0.05</b> | 0.031<br>±0.000               | 1.043<br>±0.164               | <LoD                          | 0.014<br>±0.000 | 0.062<br>±0.006               |
|                                | <b>Ni</b>      | 0.084<br>±0.003               | <b>55.44</b><br><b>±0.55</b> | <LoD                          | 0.006<br>±0.001 | <b>0.141</b><br><b>±0.001</b> | <b>166.4</b><br><b>±1.2</b> | <b>10.41</b><br><b>±0.07</b> | <b>0.032</b><br><b>±0.000</b> | 0.639<br>±0.014               | <b>2.316</b><br><b>±0.014</b> | 0.015<br>±0.001 | <b>0.057</b><br><b>±0.004</b> |

Table S4 Concentrations of the analyzed elements in the biomass of the three tested duckweed species on dry weight basis (g kg<sup>-1</sup> or mg kg<sup>-1</sup>), on the 3<sup>rd</sup> day of heavy metal treatments. Mean±SD of n=6 samples. Lower cases denote significantly different (p<0.05) median concentrations of the respective element across different treatments (control, Cr(VI) or Ni) with regard to the given duckweed species. Capitals denote significantly different (p<0.05) median concentrations of the respective element across different species with regard to the given treatment (control, Cr(VI) or Ni). Figures in red indicate that the concentration of the respective element was below the limit of detection in at least one sample and, therefore, those data were not subjected to statistical comparisons. <LoD indicate that the concentration of the respective element was below the limit of detection in all 6 samples.

| Species             | treatment | B<br>(mg kg <sup>-1</sup> )  | Ca<br>(g kg <sup>-1</sup> )  | Cr<br>(mg kg <sup>-1</sup> ) | Cu<br>(mg kg <sup>-1</sup> )  | Fe<br>(mg kg <sup>-1</sup> )  | K<br>(g kg <sup>-1</sup> )  | Mg<br>(g kg <sup>-1</sup> ) | Mn<br>(mg kg <sup>-1</sup> ) | Na<br>(g kg <sup>-1</sup> ) | Ni<br>(mg kg <sup>-1</sup> ) | Sr<br>(mg kg <sup>-1</sup> )  | Zn<br>(mg kg <sup>-1</sup> ) | K+Na+Mg+Ca<br>(g kg <sup>-1</sup> ) |
|---------------------|-----------|------------------------------|------------------------------|------------------------------|-------------------------------|-------------------------------|-----------------------------|-----------------------------|------------------------------|-----------------------------|------------------------------|-------------------------------|------------------------------|-------------------------------------|
| <i>Le. minor</i>    | control   | 175.3<br>±12.7 <sup>bA</sup> | 7.22<br>±0.67 <sup>cC</sup>  | <LoD                         | 6.47<br>±1.32 <sup>bAB</sup>  | 260.9<br>±30.5 <sup>aA</sup>  | 78.9<br>±7.5 <sup>aA</sup>  | 1.71<br>±0.14 <sup>bC</sup> | 373.3<br>±34.1 <sup>aB</sup> | 0.74<br>±0.06 <sup>bA</sup> | <u>2 ±1</u>                  | <u>0.826</u><br>±0            | 253.7<br>±45.9 <sup>bA</sup> | 88.5<br>±8.3 <sup>Aa</sup>          |
|                     | Cr(VI)    | 137.4<br>±8.8 <sup>cA</sup>  | 10.79<br>±0.28 <sup>aC</sup> | 686.6<br>±20.2 <sup>A</sup>  | 2.45<br>±0.84 <sup>cB</sup>   | 109.9<br>±14.6 <sup>bAB</sup> | 67.6<br>±2.2 <sup>bA</sup>  | 2.00<br>±0.04 <sup>aA</sup> | 178.9<br>±15.7 <sup>bA</sup> | 1.87<br>±0.19 <sup>aA</sup> | <LoD                         | <u>0.876</u><br>±0.088        | 255.7<br>±22.3 <sup>bB</sup> | 82.2<br>±2.4 <sup>Aa</sup>          |
|                     | Ni        | 475.9<br>±40.9 <sup>aA</sup> | 8.50<br>±0.68 <sup>bC</sup>  | <LoD                         | 14.06<br>±1.78 <sup>aA</sup>  | 135.1<br>±35.1 <sup>bB</sup>  | 59.1<br>±3.9 <sup>cA</sup>  | 2.02<br>±0.07 <sup>aA</sup> | 147.9<br>±20.7 <sup>cB</sup> | 0.32<br>±0.05 <sup>cB</sup> | 1554<br>±179 <sup>B</sup>    | 0.704<br>±0.148 <sup>C</sup>  | 445.5<br>±53.1 <sup>aB</sup> | 69.9<br>±4.5 <sup>Ab</sup>          |
| <i>La. punctata</i> | control   | 128.4<br>±7.1 <sup>bB</sup>  | 12.08<br>±0.68 <sup>aB</sup> | <LoD                         | 5.43<br>±0.52 <sup>bB</sup>   | 128.5<br>±23.4 <sup>bB</sup>  | 57.8<br>±2.8 <sup>abB</sup> | 1.96<br>±0.09 <sup>aB</sup> | 456.4<br>±39.4 <sup>aA</sup> | 0.56<br>±0.05 <sup>bB</sup> | <u>6 ±5</u>                  | 1.703<br>±0.468 <sup>aB</sup> | 308.7<br>±22.6 <sup>bA</sup> | 72.4<br>±3.4 <sup>Ba</sup>          |
|                     | Cr(VI)    | 80.1<br>±6.4 <sup>cB</sup>   | 12.87<br>±1.23 <sup>aB</sup> | 640.3<br>±36.3 <sup>B</sup>  | 3.71<br>±2.06 <sup>bAB</sup>  | 101.7<br>±15.0 <sup>cB</sup>  | 59.5<br>±3.3 <sup>aB</sup>  | 2.03<br>±0.12 <sup>aA</sup> | 221.9<br>±58.7 <sup>bA</sup> | 1.11<br>±0.19 <sup>aB</sup> | <u>9 ±7</u>                  | <u>1.595</u><br>±0.481        | 346.0<br>±58.6 <sup>bA</sup> | 75.5<br>±4.5 <sup>Ba</sup>          |
|                     | Ni        | 147.6<br>±15.0 <sup>aC</sup> | 9.85<br>±1.25 <sup>bB</sup>  | <LoD                         | 11.84<br>±2.26 <sup>aAB</sup> | 157.1<br>±17.2 <sup>aAB</sup> | 49.3<br>±6.5 <sup>bB</sup>  | 1.51<br>±0.16 <sup>bB</sup> | 184.8<br>±19.8 <sup>bA</sup> | 0.46<br>±0.07 <sup>cA</sup> | 1532<br>±192 <sup>B</sup>    | 1.185<br>±0.543 <sup>aB</sup> | 707.3<br>±84.6 <sup>aA</sup> | 61.2<br>±7.9 <sup>Bb</sup>          |
| <i>S. polyrhiza</i> | control   | 133.7<br>±17.1 <sup>bB</sup> | 14.96<br>±1.64 <sup>bA</sup> | <LoD                         | 7.25<br>±1.21 <sup>bA</sup>   | 228.0<br>±15.9 <sup>aA</sup>  | 51.5<br>±4.8 <sup>abC</sup> | 2.29<br>±0.20 <sup>aA</sup> | 231.1<br>±21.5 <sup>aC</sup> | 0.25<br>±0.07 <sup>bC</sup> | <u>1 ±0</u>                  | 3.247<br>±0.860 <sup>aA</sup> | 174.7<br>±36.0 <sup>bB</sup> | 69.0<br>±6.4 <sup>Bab</sup>         |
|                     | Cr(VI)    | 63.4<br>±9.4 <sup>cC</sup>   | 1.71<br>±1.20 <sup>abA</sup> | 480.4<br>±17.1 <sup>C</sup>  | 4.19<br>±0.86 <sup>cA</sup>   | 129.8<br>±25.4 <sup>bA</sup>  | 46.9<br>±2.9 <sup>bC</sup>  | 2.13<br>±0.19 <sup>aA</sup> | 112.4<br>±11.1 <sup>bB</sup> | 0.34<br>±55.6 <sup>aC</sup> | <u>3 ±0</u>                  | 3.303<br>±0.537 <sup>a</sup>  | 144.6<br>±30.2 <sup>bC</sup> | 66.5<br>±4.2 <sup>Cb</sup>          |
|                     | Ni        | 263.2<br>±13.5 <sup>aB</sup> | 18.09<br>±1.12 <sup>aA</sup> | <LoD                         | 9.73<br>±0.54 <sup>aB</sup>   | 197.1<br>±41.3 <sup>aA</sup>  | 54.1<br>±2.0 <sup>aB</sup>  | 1.50<br>±0.05 <sup>bB</sup> | 106.3<br>±12.2 <sup>bC</sup> | 0.18<br>±0.36 <sup>bC</sup> | 1840 ±46 <sup>A</sup>        | 3.257<br>±0.647 <sup>aA</sup> | 368.7<br>±31.6 <sup>aC</sup> | 73.9<br>±2.9 <sup>Aa</sup>          |

Table S5 Correlations of the corresponding elements with the principal components

|           | PC 1     | PC 2      | PC 3     | PC 4     | PC 5     | PC 6      | PC 7      | PC 8      | PC 9       | PC 10      | PC 11      | PC 12     |
|-----------|----------|-----------|----------|----------|----------|-----------|-----------|-----------|------------|------------|------------|-----------|
| <b>B</b>  | 0.6962   | 0.28978   | 0.11911  | 0.52976  | -0.21835 | -0.10033  | 0.13789   | -0.20309  | -0.06863   | -0.011422  | -0.0022718 | 0.11683   |
| <b>Ca</b> | -0.04582 | -0.86588  | -0.16679 | 0.10349  | 0.23275  | 0.26331   | 0.18311   | -0.058085 | -0.024169  | 0.21978    | -0.0025967 | 0.018053  |
| <b>Cr</b> | -0.13652 | 0.7063    | -0.28131 | 0.25069  | 0.36024  | 0.343     | -0.15566  | -0.24056  | -0.077846  | -0.030377  | -0.028748  | -0.056495 |
| <b>Cu</b> | 0.89258  | 0.12543   | 0.2287   | 0.13733  | -0.15772 | 0.16185   | -0.020698 | 0.14979   | -0.12328   | 0.038467   | 0.13374    | -0.088901 |
| <b>Fe</b> | 0.093164 | -0.044247 | 0.85293  | 0.12455  | 0.37803  | -0.036965 | -0.29572  | 0.019651  | 0.074703   | 0.07864    | 0.0015852  | 0.049897  |
| <b>K</b>  | -0.36035 | 0.66903   | 0.30329  | 0.39098  | 0.19414  | -0.091247 | 0.26297   | 0.22661   | -0.0033633 | 0.040446   | -0.079205  | -0.057064 |
| <b>Mg</b> | -0.48711 | -0.25724  | -0.12555 | 0.49753  | -0.54707 | 0.25584   | -0.19471  | 0.15224   | 0.076605   | 0.0061193  | -0.03668   | 0.013098  |
| <b>Mn</b> | -0.47232 | 0.43191   | 0.53174  | -0.24855 | -0.178   | 0.37242   | 0.20322   | -0.096992 | 0.13468    | -0.036937  | 0.066066   | 0.029751  |
| <b>Na</b> | -0.55965 | 0.53882   | -0.5114  | 0.12534  | 0.24589  | -0.082388 | -0.03169  | 0.14895   | 0.015454   | 0.041706   | 0.13774    | 0.088489  |
| <b>Ni</b> | 0.82231  | -0.14059  | -0.30161 | 0.21115  | 0.24367  | 0.037054  | 0.057421  | 0.022843  | 0.31474    | -0.063049  | 0.010941   | -0.027617 |
| <b>Sr</b> | -0.23115 | -0.81422  | 0.17018  | 0.21078  | 0.33775  | 0.13809   | 0.076743  | 0.10304   | -0.11579   | -0.21361   | 0.023475   | 0.031461  |
| <b>Zn</b> | 0.7181   | 0.41206   | -0.15616 | -0.35224 | 0.0726   | 0.29343   | -0.0197   | 0.23501   | -0.053053  | -0.0025983 | -0.088664  | 0.09171   |
